# Supplementary material for: Luminol chemiluminescence actuated by modified natural sepiolite material and its analytical application
Source: Royal Society of Chemistry journal article supplement (doi:10.1039/c4ay03093a), 2015-01-01
Supplement: c4ay03093a1.pdf [file c4ay03093a1.pdf]

## **Supplementary Information**

Luminol chemiluminescence actuated by modified natural sepiolite  
material and its analytical application

Zhihua Wang, Changxin Zhao, Dongmei Han, Fubo Gu\*

State Key Laboratory of Chemical Resource Engineering, Beijing University of Chemical  
Technology, Beijing 100029, China

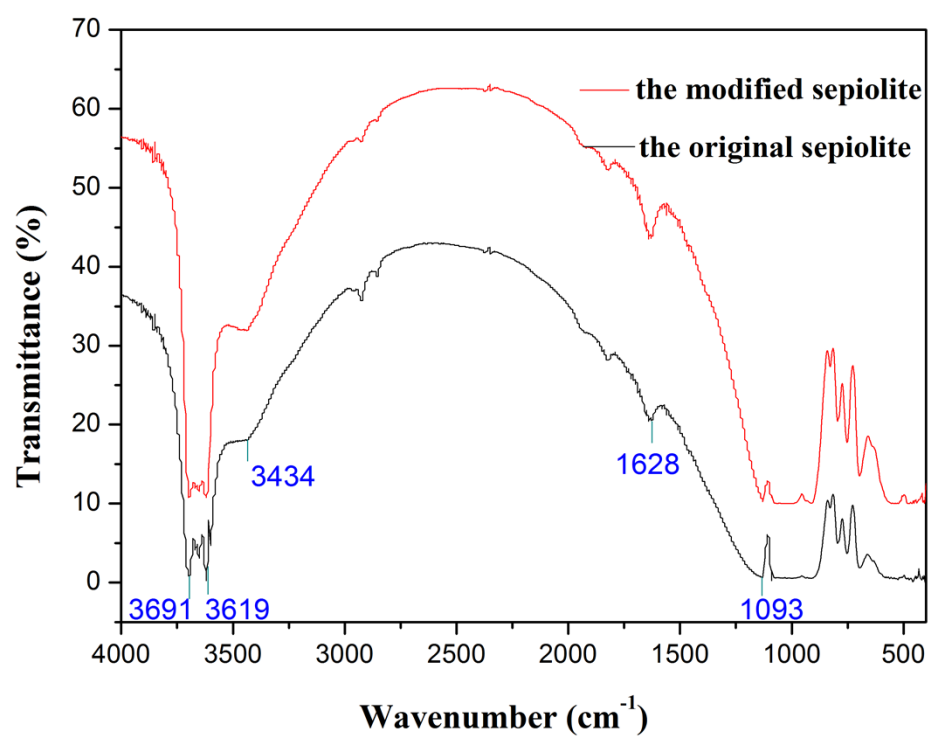

**Fig.S1** FTIR spectrum of the original and modified sepiolite.

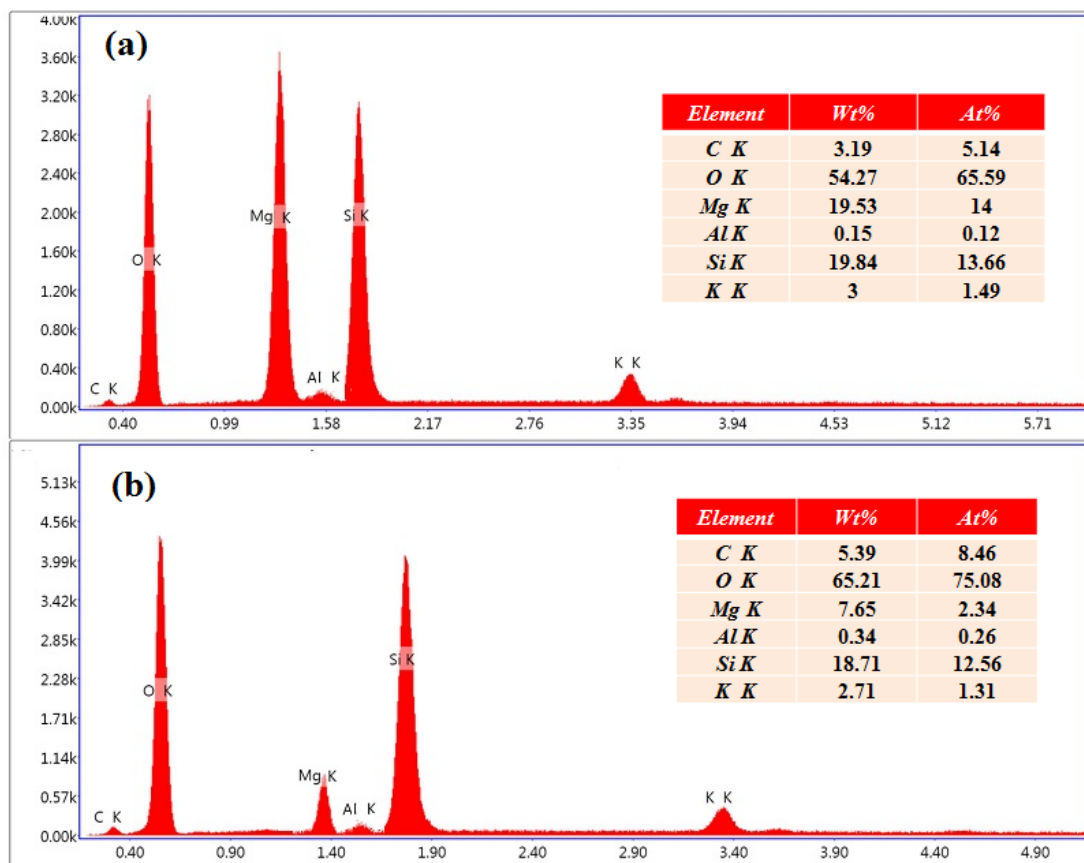

**Fig. S2** EDAX analysis of (a) the original sepiolite and (b) the modified sepiolite.

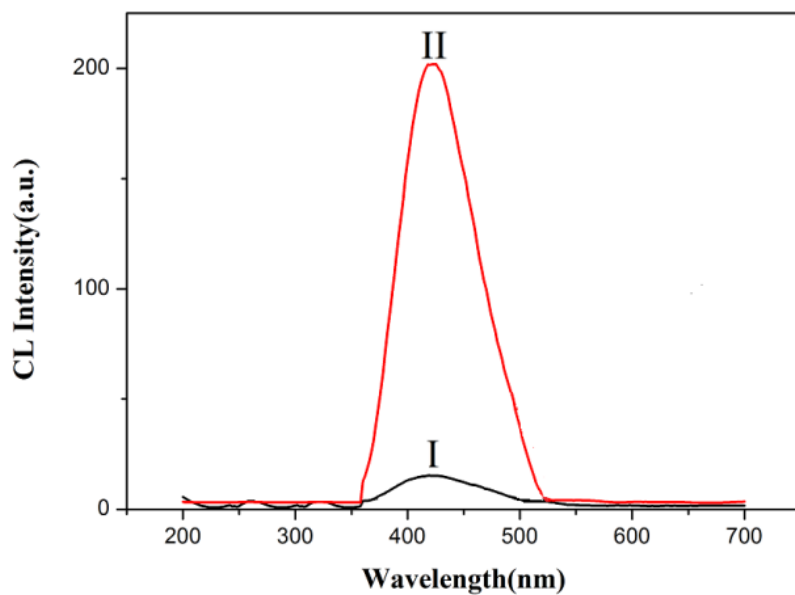

**Fig.S3** CL spectra for the luminol-H<sub>2</sub>O<sub>2</sub> system in the absence (I) and presence (II) of sepiolite. Conditions: 25 mg·mL<sup>-1</sup> sepiolite treated at 100 °C for 4 h, the pH of sepiolite was 1.0; 0.08 mM luminol in pH 11.6; 1 mM H<sub>2</sub>O<sub>2</sub>; the flow rates of P1 and P2 were 2.6 mL·min<sup>-1</sup> and 2.2 mL·min<sup>-1</sup>, respectively.

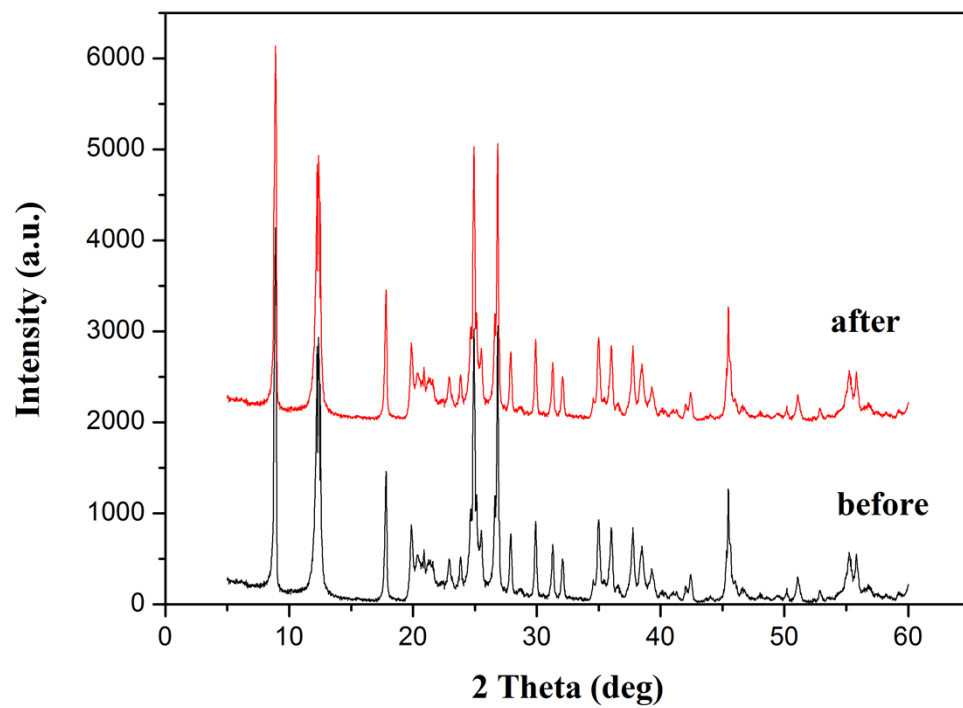

**Fig. S4** Powder XRD patterns of sepiolite before and after CL reaction

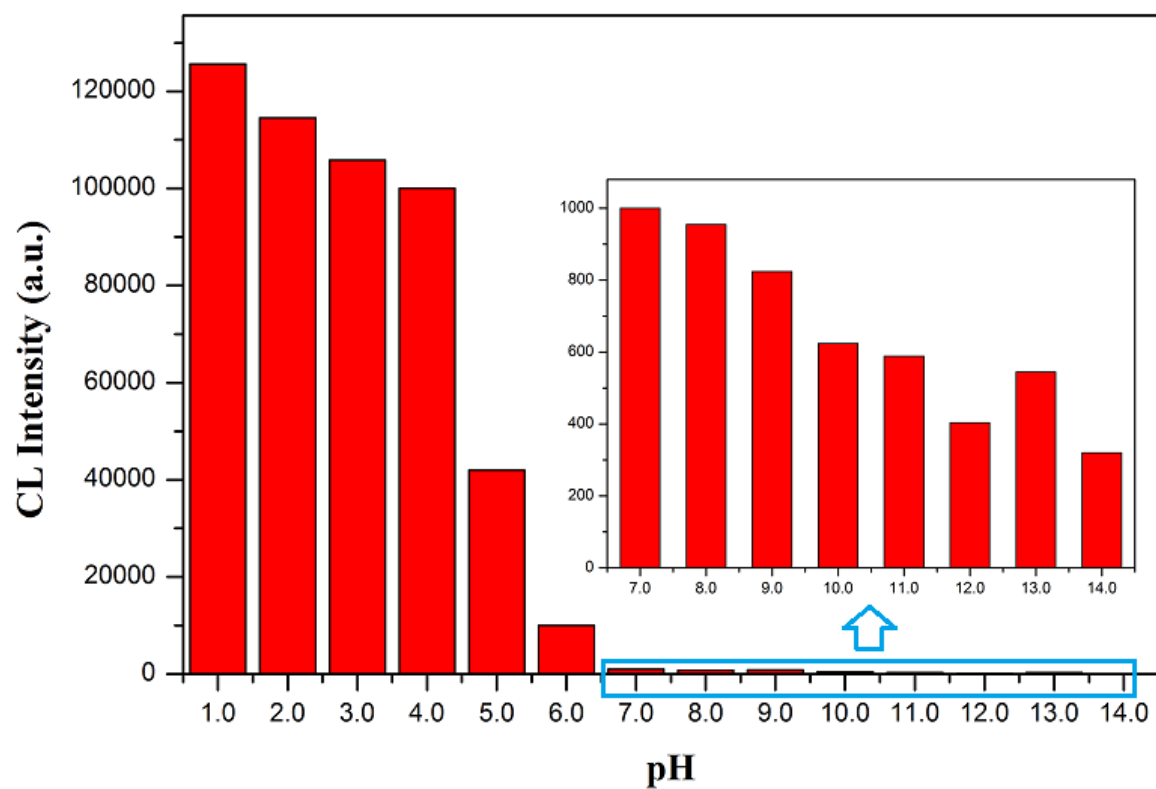

**Fig.S5** Effect of the pH of sepiolite on sepiolite catalyzed luminol CL. Conditions: 10  $\text{mg}\cdot\text{mL}^{-1}$  sepiolite treated at 20 °C for 1 h; 0.2 mM luminol in pH 11.0; 1 mM  $\text{H}_2\text{O}_2$ ; 2.0  $\text{mL}\cdot\text{min}^{-1}$  flow rate.

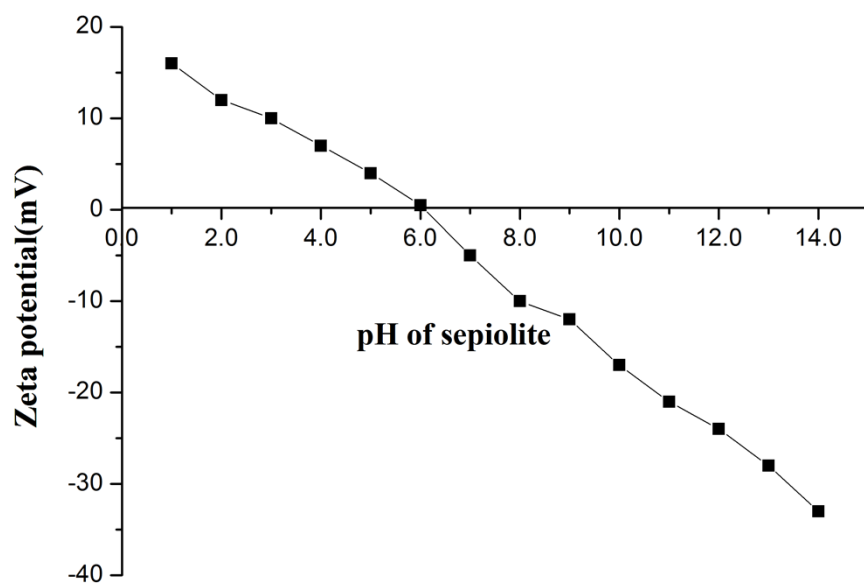

**Fig.S6** Effect of the pH of sepiolite on zeta potential. Conditions: 25 mg·mL<sup>-1</sup> sepiolite treated at 100°C for 4 h.

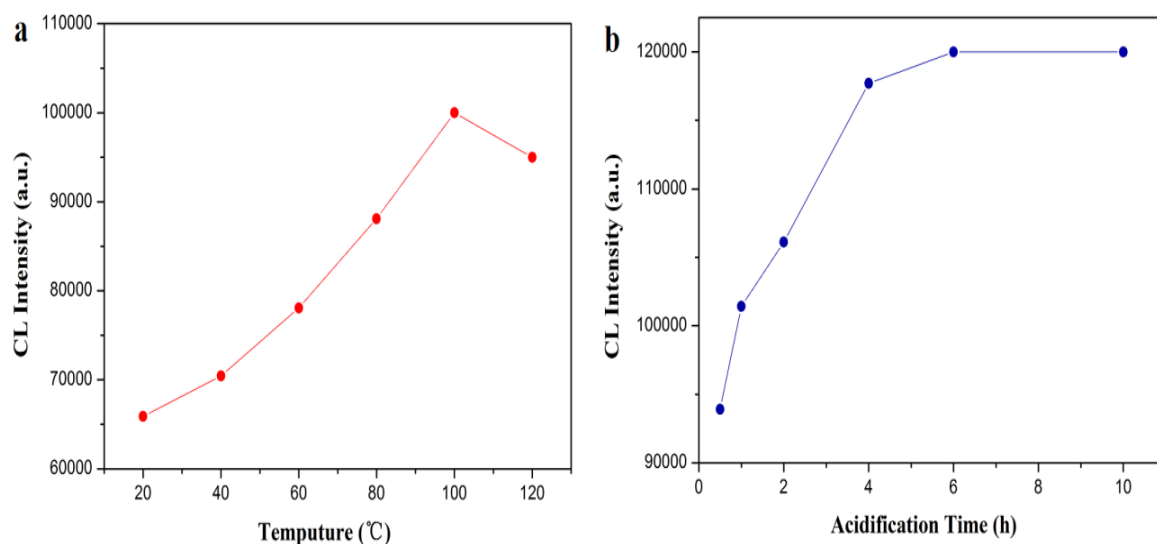

**Fig. S7** Effect of the reaction temperature and time of sepiolite on sepiolite catalyzed luminol CL. (a) Reaction temperature of sepiolite: the reaction time was 1 h, the pH of sepiolite was 1.0, the concentration of sepiolite was 10 mg·mL<sup>-1</sup>; 0.2 mM luminol in pH 11.0; 1 mM H<sub>2</sub>O<sub>2</sub>; 2.0 mL·min<sup>-1</sup> flow rate. (b) Reaction time of sepiolite: the reaction temperature was 100 °C, the pH of sepiolite was 1.0, the concentration of sepiolite was 10 mg·mL<sup>-1</sup>; 0.2 mM luminol in pH 11.0; 1 mM H<sub>2</sub>O<sub>2</sub>; 2.0 mL·min<sup>-1</sup> flow rate.



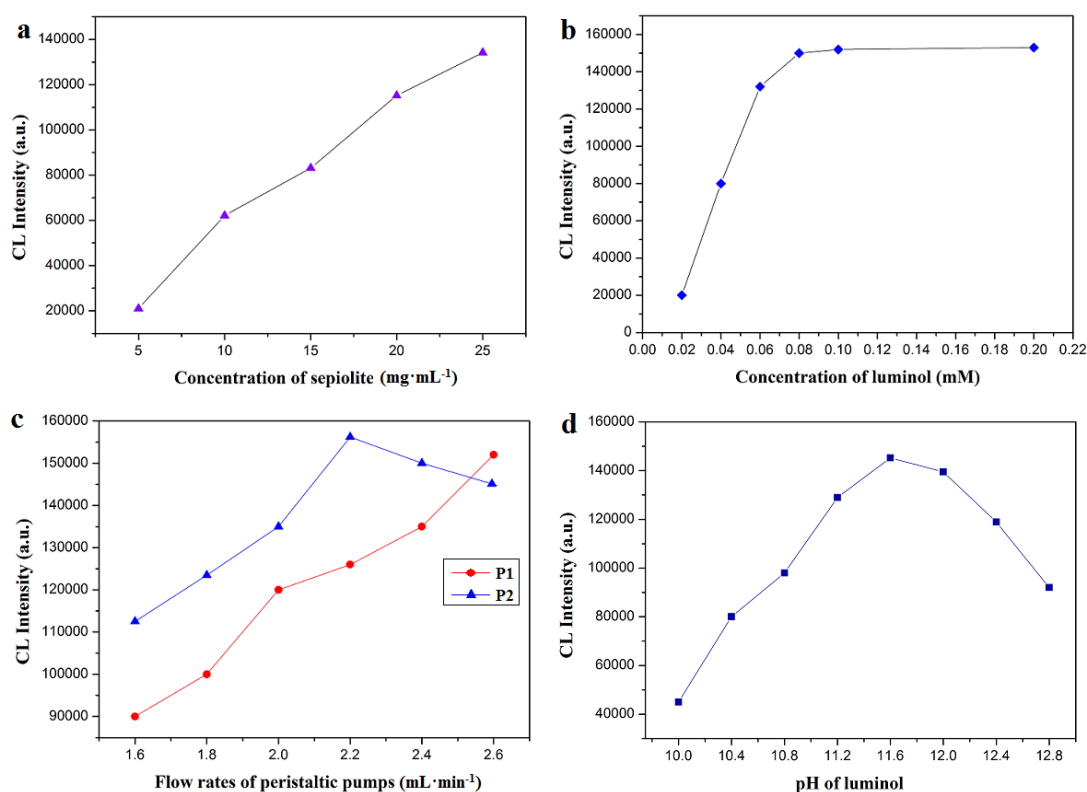

**Fig.S8** Effects of the analytical conditions on sepiolite catalyzed luminol CL. The sepiolite was treated at 100 °C for 4 h, the pH of sepiolite was 1.0. (a) Concentration of sepiolite: 0.2 mM luminol in pH 11.0; 1 mM  $\text{H}_2\text{O}_2$ ; 2.0  $\text{mL} \cdot \text{min}^{-1}$  flow rate. (b) Concentration of luminol: 25  $\text{mg} \cdot \text{mL}^{-1}$  sepiolite; luminol in pH 11.0; 1 mM  $\text{H}_2\text{O}_2$ ; 2.0  $\text{mL} \cdot \text{min}^{-1}$  flow rate. (c) Flow rates of peristaltic pumps: 25  $\text{mg} \cdot \text{mL}^{-1}$  sepiolite; 0.08 mM luminol in pH 11.0; 1 mM  $\text{H}_2\text{O}_2$ . (d) The pH of luminol: 25  $\text{mg} \cdot \text{mL}^{-1}$  sepiolite; 0.08 mM luminol; 1 mM  $\text{H}_2\text{O}_2$ ; the flow rates of P1 and P2 were 2.6  $\text{mL} \cdot \text{min}^{-1}$  and 2.2  $\text{mL} \cdot \text{min}^{-1}$ , respectively.

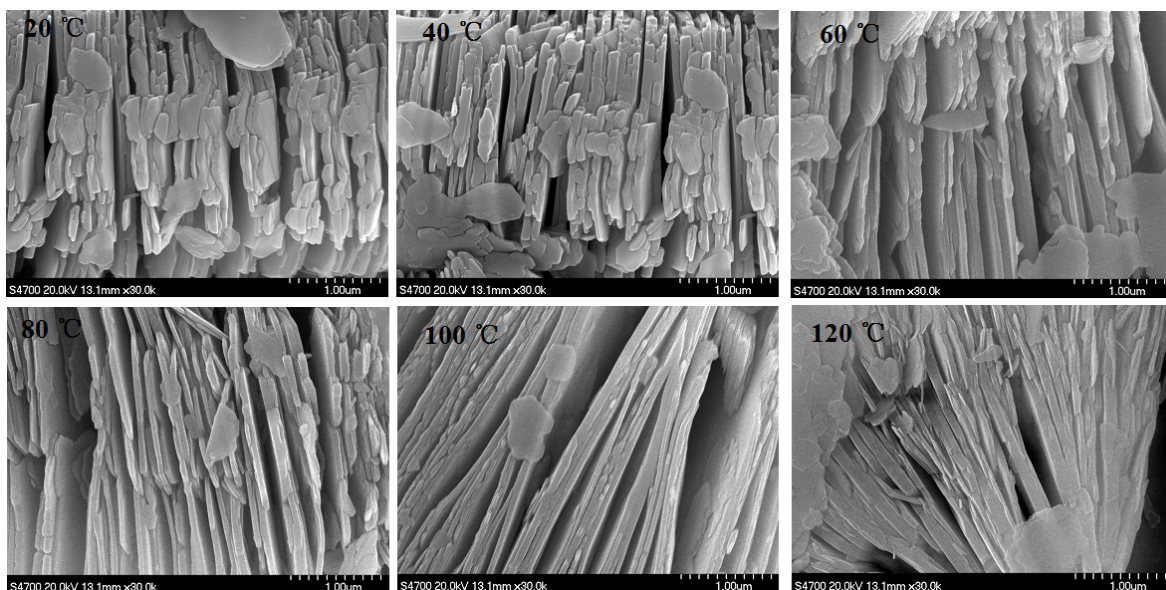

**Fig.S9** SEM images of sepiolite with different reaction temperature. Conditions: the reaction time was 1 h, the pH of sepiolite was 1.0, the concentration of sepiolite was 10 mg·mL<sup>-1</sup>.

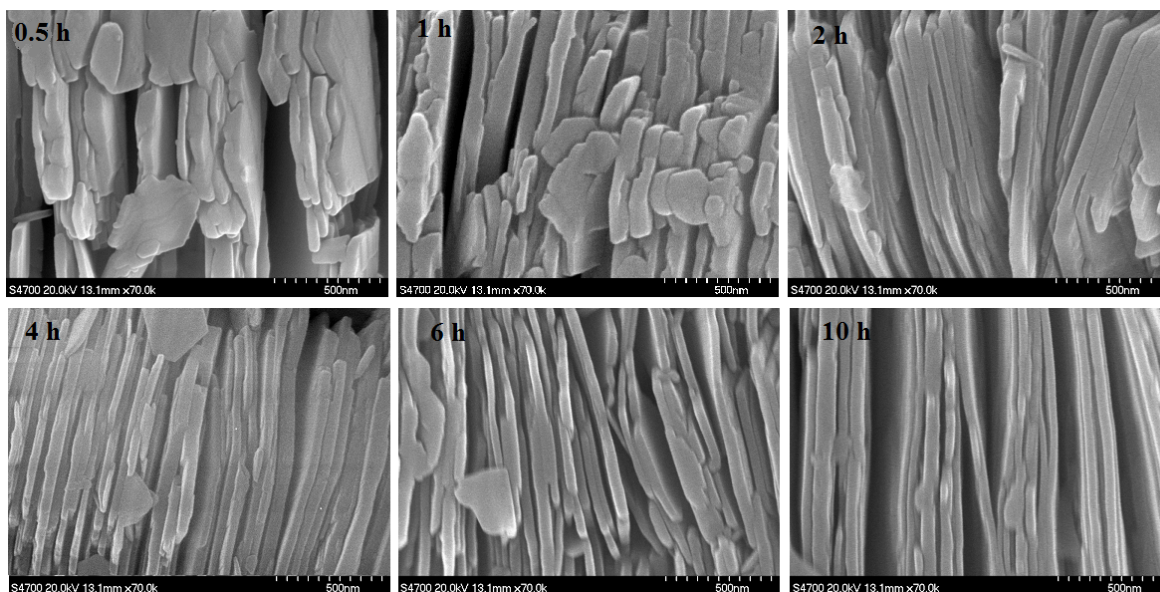

**Fig.S10** SEM images of sepiolite with different acidification time. Conditions: the reaction temperature was 100 °C, the pH of sepiolite was 1.0, the concentration of sepiolite was 10 mg·mL<sup>-1</sup>.
